# Supplementary material
Source: PubMed Central journal article supplement (PMC4881825)

**Figure A1: Crude Event Rates for Smoking Behaviors in Year Following a Screening Exam by Screening Result**

**Participants with Baseline Screen**

**Point Abstinence Among Smokers**

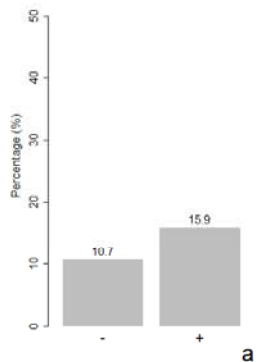

**Prolonged Abstinence Among Smokers**

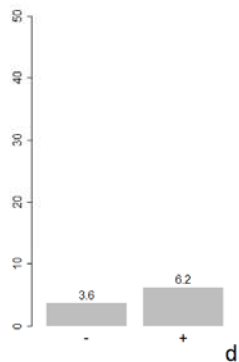

**Relapse Among Recently Quit Former Smokers**

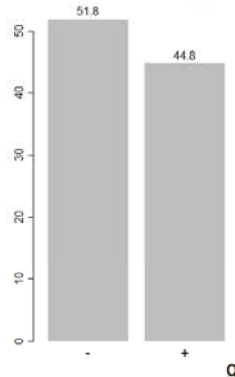

**Relapse Among Long-Term Abstinent Former Smokers**

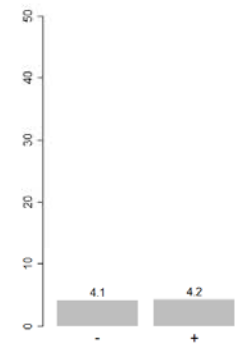

**Participants with Baseline and 1st Incident Screen**

**Point Abstinence Among Smokers**

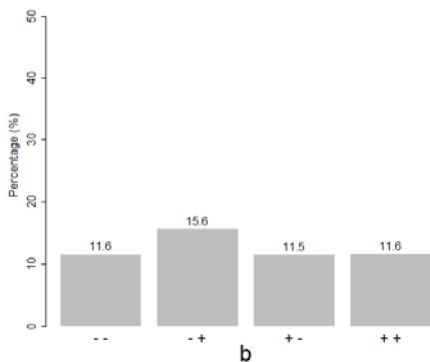

**Prolonged Abstinence Among Smokers**

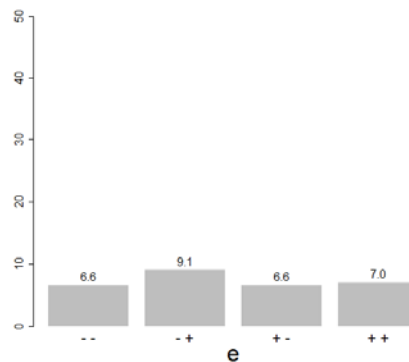

**Relapse Among Recently Quit Former Smokers**

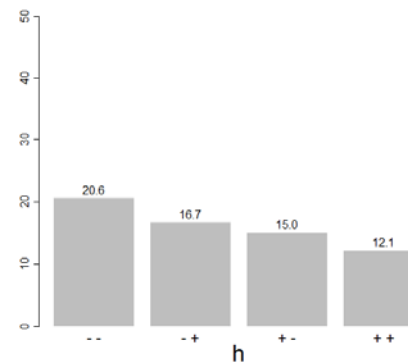

**Relapse Among Long-Term Abstinent Former Smokers**

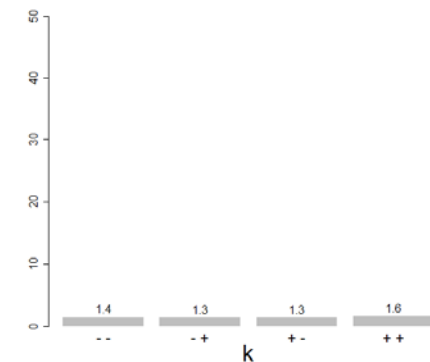

**Participants with Baseline and 1st and 2nd Incident Screens**

**Point Abstinence Among Smokers**

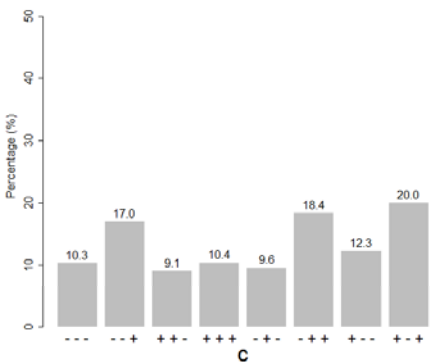

**Prolonged Abstinence Among Smokers**

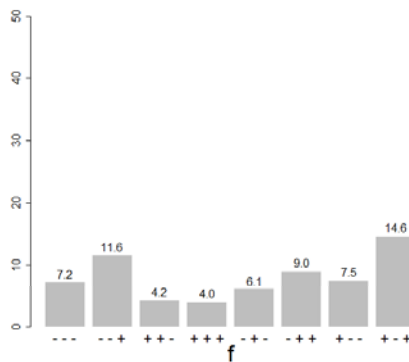

**Relapse Among Recently Quit Former Smokers**

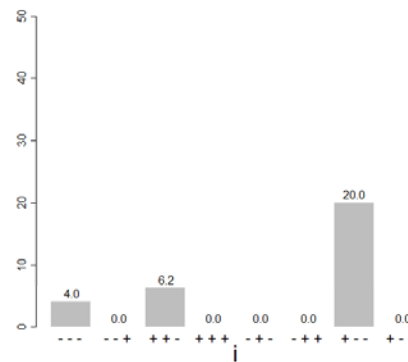

**Relapse Among Long-Term Abstinent Former Smokers**

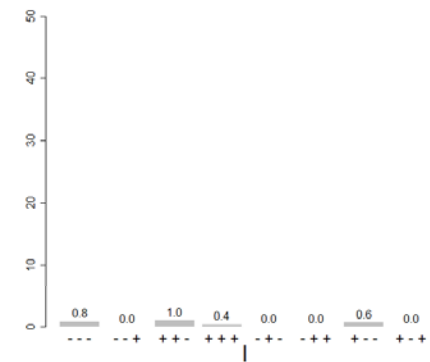

Supplement: supp_ntv037_Figure_A1.pdf [file supp_ntv037_Figure_A1.pdf]
